# Supplementary material for: Cost-effectiveness Analysis of Moderately Hypofractionated Radiation Therapy with Helical TomoTherapy Versus Conventional Radiation Therapy for Unresectable Stage III Non-small Cell Lung Cancer
Source: Research Square preprint supplement (doi:10.21203/rs.3.rs-6470075/v1), 2025-05-08

Supplementary

Table S1. Goodness-of-fit under different distributions of survival curves between the two patient groups.

| Distribution function | Weibull | Expotional | Expotional | Gompertz | Log-logistic | Log-normal | Gamma |
| --- | --- | --- | --- | --- | --- | --- | --- |
| OS curve of the Hypo-RT group | AIC | 375.30 | 369.68 | 365.11 | 375.93 | 371.41 | 371.41 |
| BIC | 377.59 | 374.27 | 371.98 | 380.51 | 375.99 | 375.99 |
| PFS curve of the Hypo-RT group | AIC | 437.18 | 438.68 | 431.66 | 436.23 | 439.15 | 439.15 |
| BIC | 443.25 | 438.52 | 440.81 | 443.73 | 443.73 | 435.42 |
| OS curve of the Con-RT group | AIC | 446.87 | 438.06 | 436.41 | 444.79 | 439.80 | 439.80 |
| BIC | 449.16 | 442.64 | 443.28 | 449.37 | 444.38 | 444.38 |
| PFS curve of the Con-RT group | AIC | 477.88 | 476.25 | 450.80 | 479.50 | 478.46 | 478.46 |
| BIC | 480.16 | 480.83 | 457.67 | 484.08 | 483.04 | 483.04 |

Figure S1. Reconstructed OS Curves Comparing Conventional versus Hypofractionated Radiotherapy.


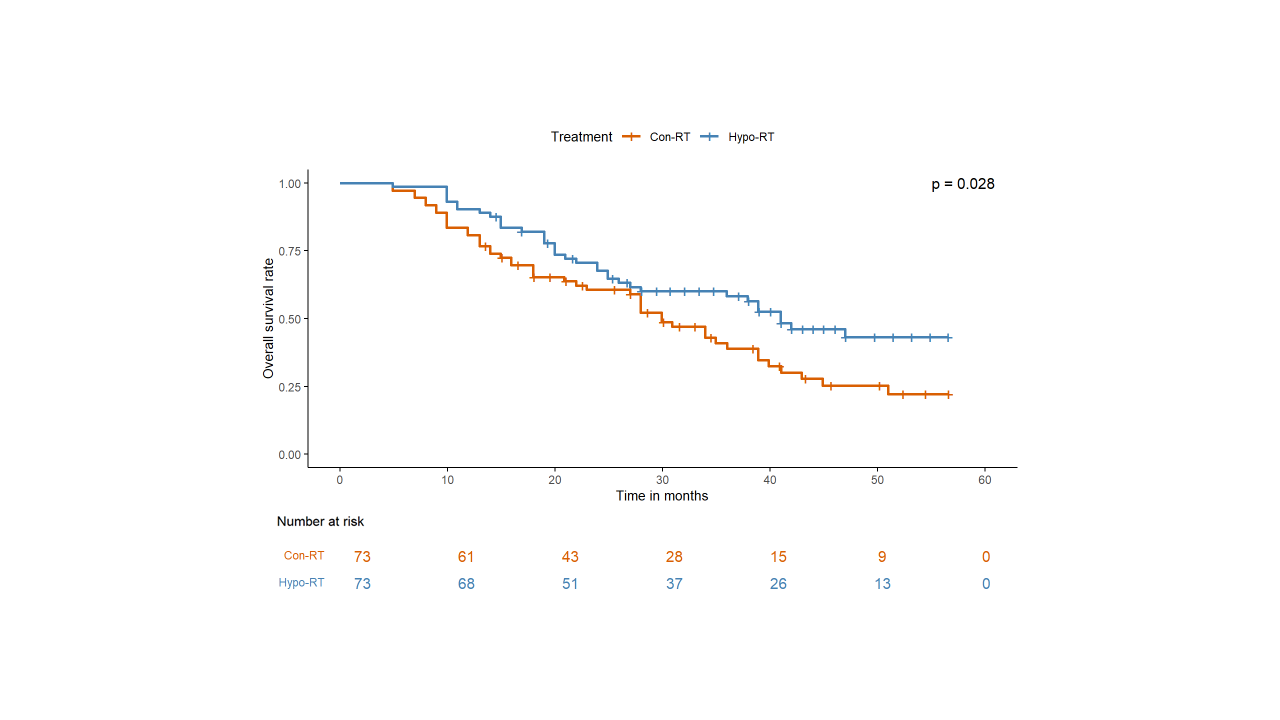


Figure S2. Reconstructed PFS Curves Comparing Conventional versus Hypofractionated Radiotherapy.


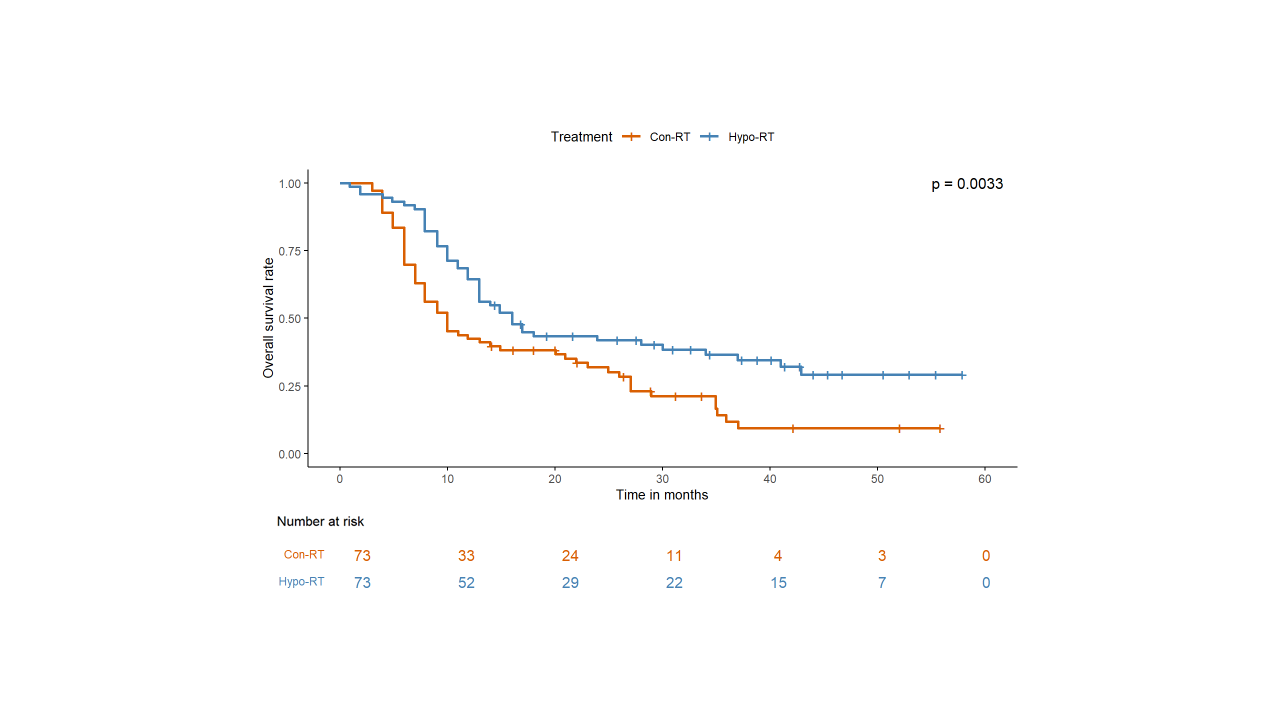

Supplement: Supplementary file 1 [file edd5ebe806ed8d24e8512d1b.docx]
